# Supplementary material for: HIV-1 Transcription Inhibition Using Small RNA-Binding Molecules
Source: MDPI journal article supplement (doi:10.3390/ph17010033), 2023-12-25
Supplement: s1 [file s1]

# **HIV-1 Transcription Inhibition Using Small RNA binding molecules**

**Pooja Khatkar<sup>1</sup>, Gifty Mensah<sup>1</sup>, Shangbo Ning<sup>2</sup>, Maria Cowen<sup>1</sup>, Yuriy Kim<sup>1</sup>,  
Anastasia Williams<sup>1</sup>, Fardokht A. Abulwerdi<sup>3</sup>, Yunjie Zhao<sup>2</sup>, Chen Zeng<sup>4</sup>, Stuart F. J. Le Grice<sup>3</sup>  
and Fatah Kashanchi<sup>1,\*</sup>**

<sup>1</sup> Laboratory of Molecular Virology, School of Systems Biology, George Mason University, Manassas, VA 20110, USA

<sup>2</sup> Institute of Biophysics and Department of Physics, Central China Normal University, Wuhan 430079, China

<sup>3</sup> Basic Research Laboratory, National Cancer Institute, Frederick, MD 21702, USA

<sup>4</sup> Physics Department, The George Washington University, Washington, DC 20052, USA

\* Correspondence: [fkashanc@gmu.edu](mailto:fkashanc@gmu.edu); Tel.: +1-703-993-9160; Fax: +1-703-993-7022

## Supplementary Information

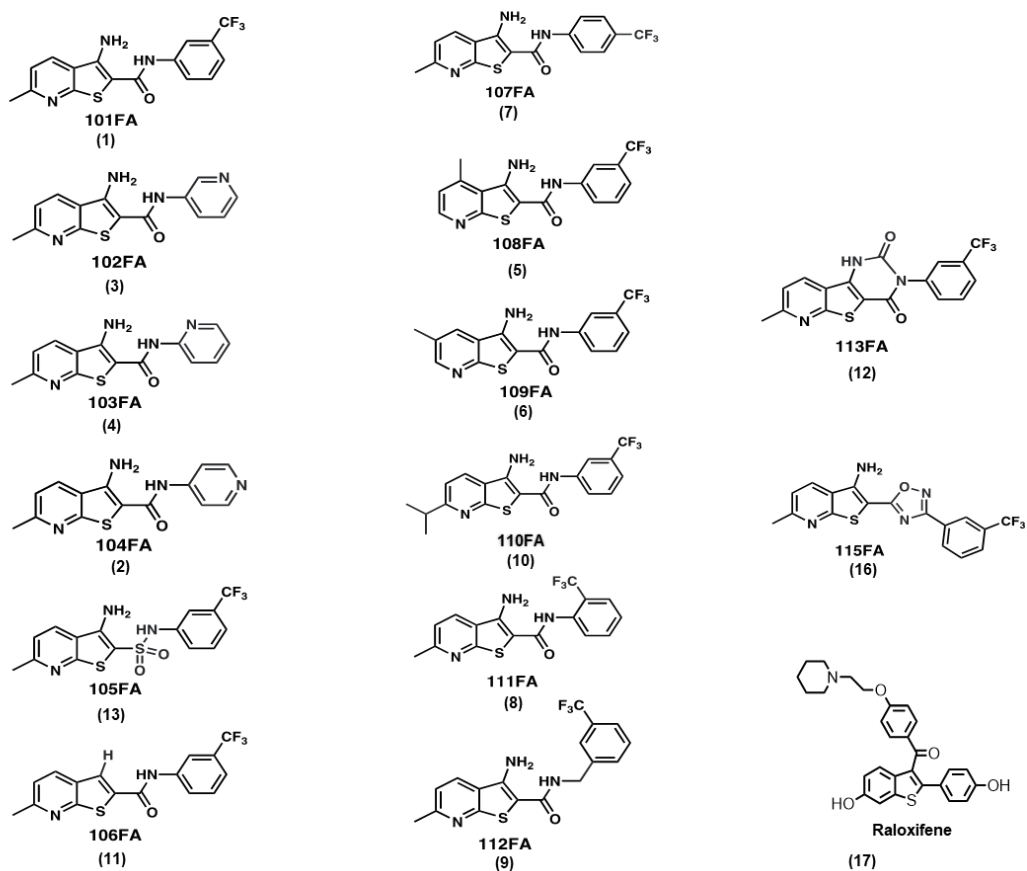

Figure S1. Chemical Structure of Molecules used in the study.

## Supplementary Information

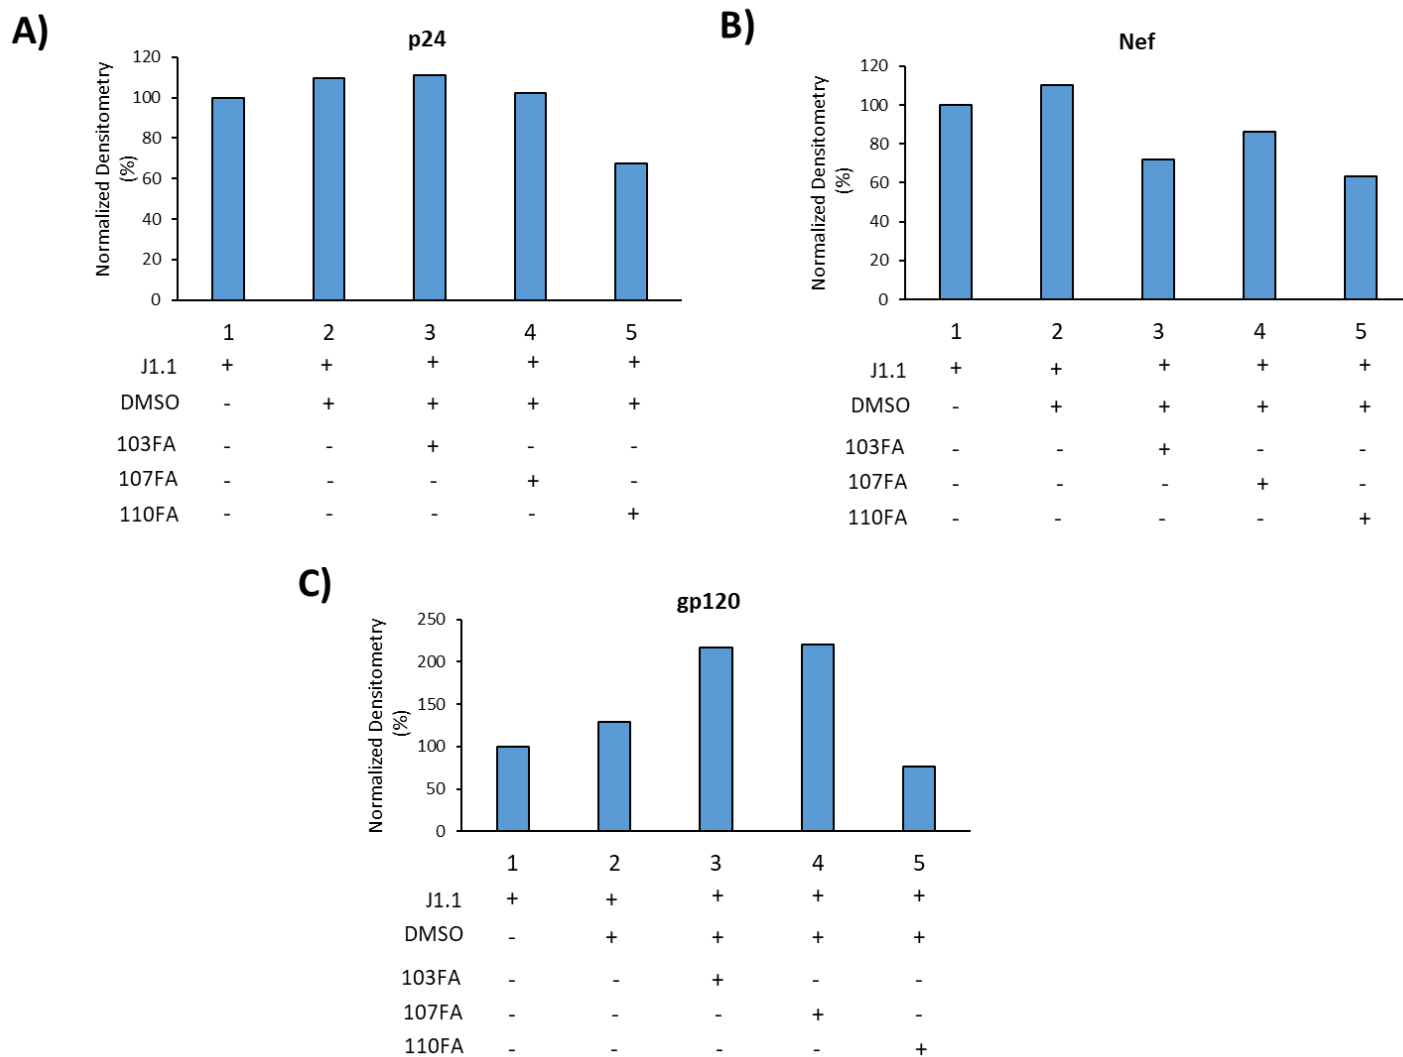

**Figure S2. Normalized densitometry analysis of lead TAR-binding molecules effects on HIV-1 infected T-cells (J1.1). (A) p24, (B) Nef and (C) gp120. Densitometry counts**

## Supplementary Information

were performed on the Western blot data from Figure 3A, all of which were normalized to Actin levels.

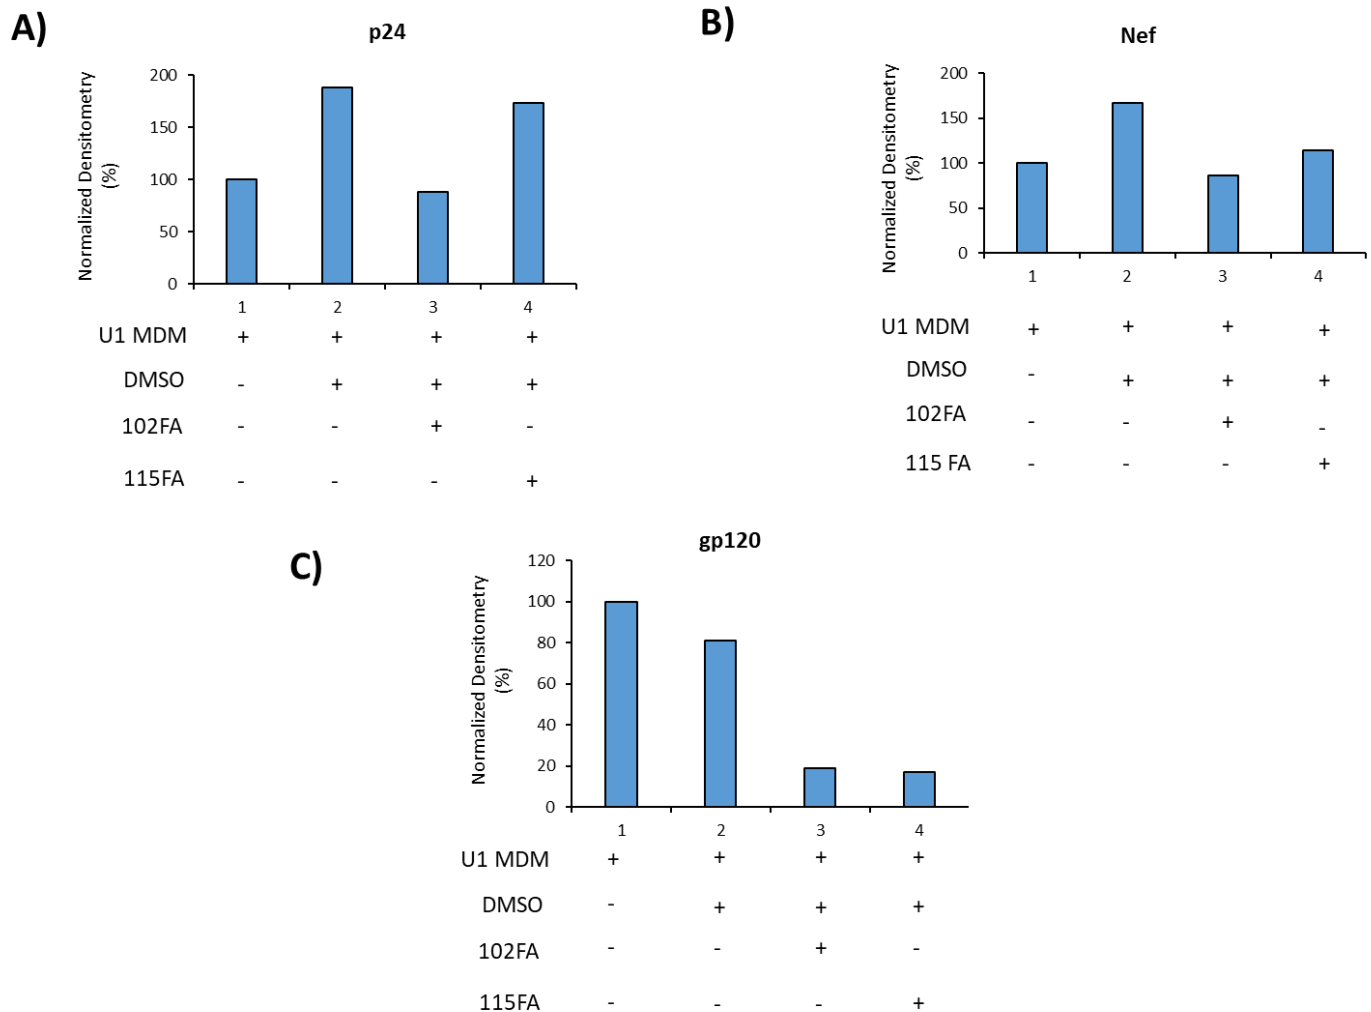

**Figure S3. Normalized densitometry analysis of lead TAR-binding molecules effects on HIV-1 infected HIV-1 Infected monocytes derived macrophages (U1 MDMs). (A)**

## Supplementary Information

p24, (B) Nef, and (C)gp120. Densitometry counts were performed on the Western blot data from Figure 3B, all of which were normalized to Actin levels.

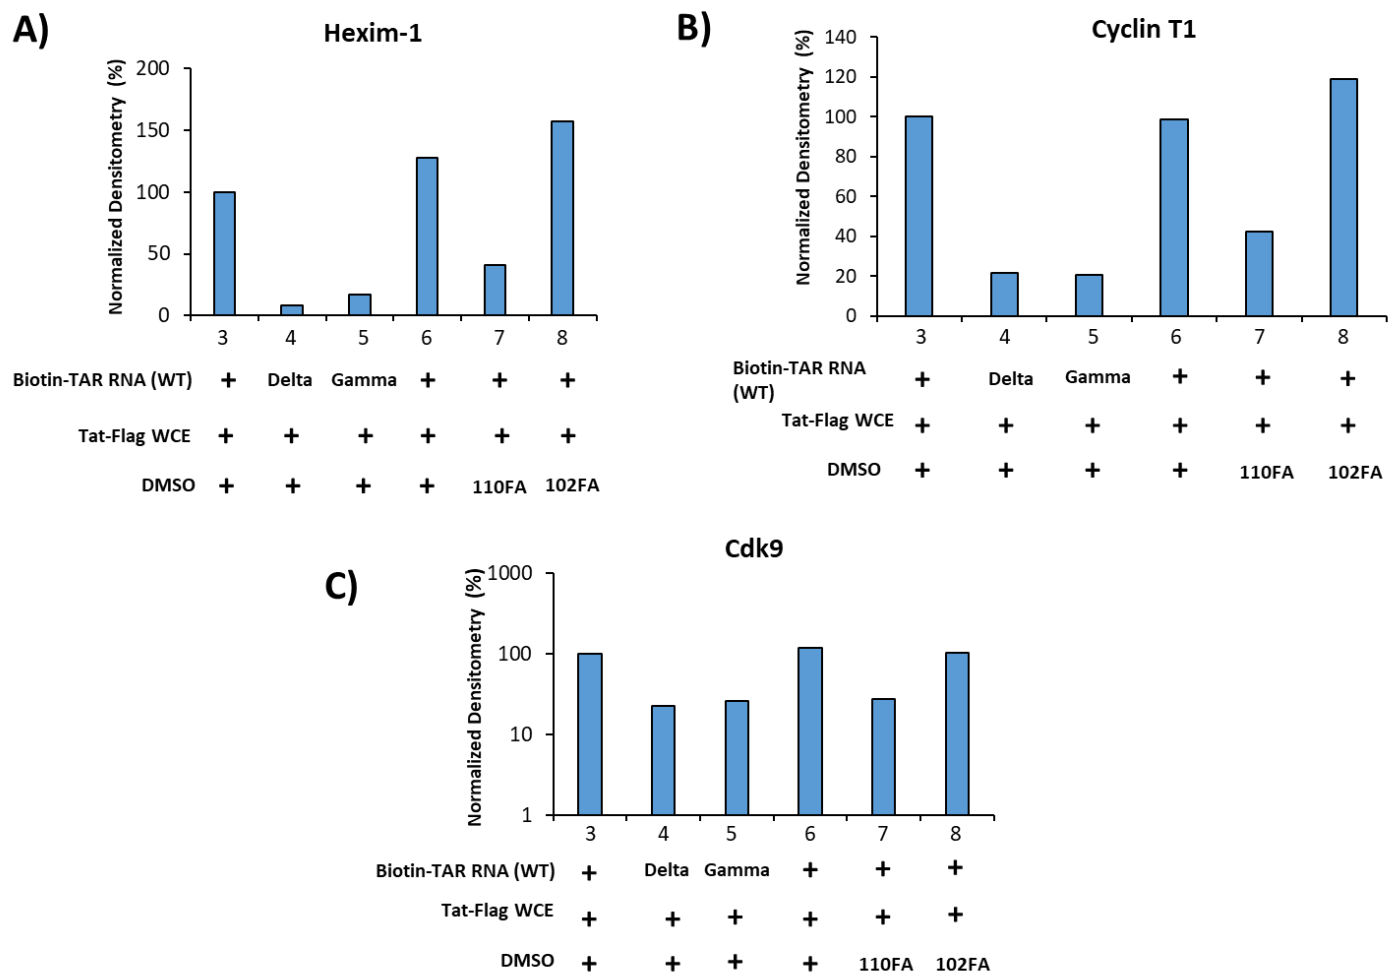

**Figure S4. Densitometry analysis of Proteins from Biotinylated RNA pulldown Assay.**

(A) Hexim-1, (B) Cyclin T1, (C) and Cdk9. Densitometry counts were performed on the Western blot data from Figure 4B.

## Supplementary Information

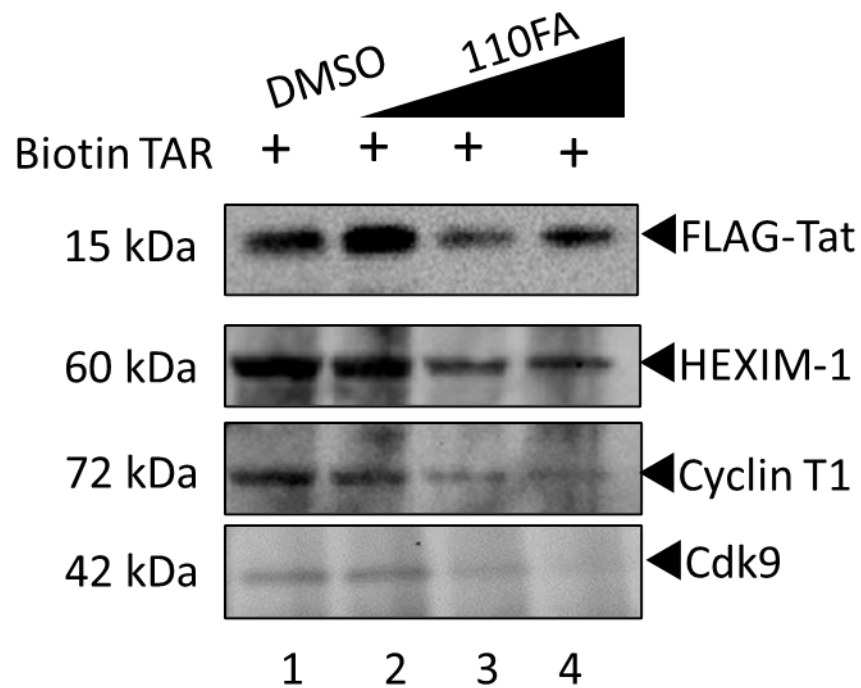

**Figure S5. Dose dependent Effect of 110FA on Tat-TAR RNA Interaction in a Biotinylated RNA Pull down assay.** Biotinylated RNA pull down assay followed by immunoblot using protein lysate prepared from 293T-cells expressing Flag-Tat and Biotin- WT TAR RNA. After in-cubation, the mixture was treated with 1, 5 and 10  $\mu$ M of the TAR RNA binding molecules 110FA. Coupled proteins were eluted out from beads with Laemmli buffer, run on SDS-PAGE and detected with Anti-Flag, HEXIM-1, Cyclin T1, Cdk9 antibodies.

## Supplementary Information

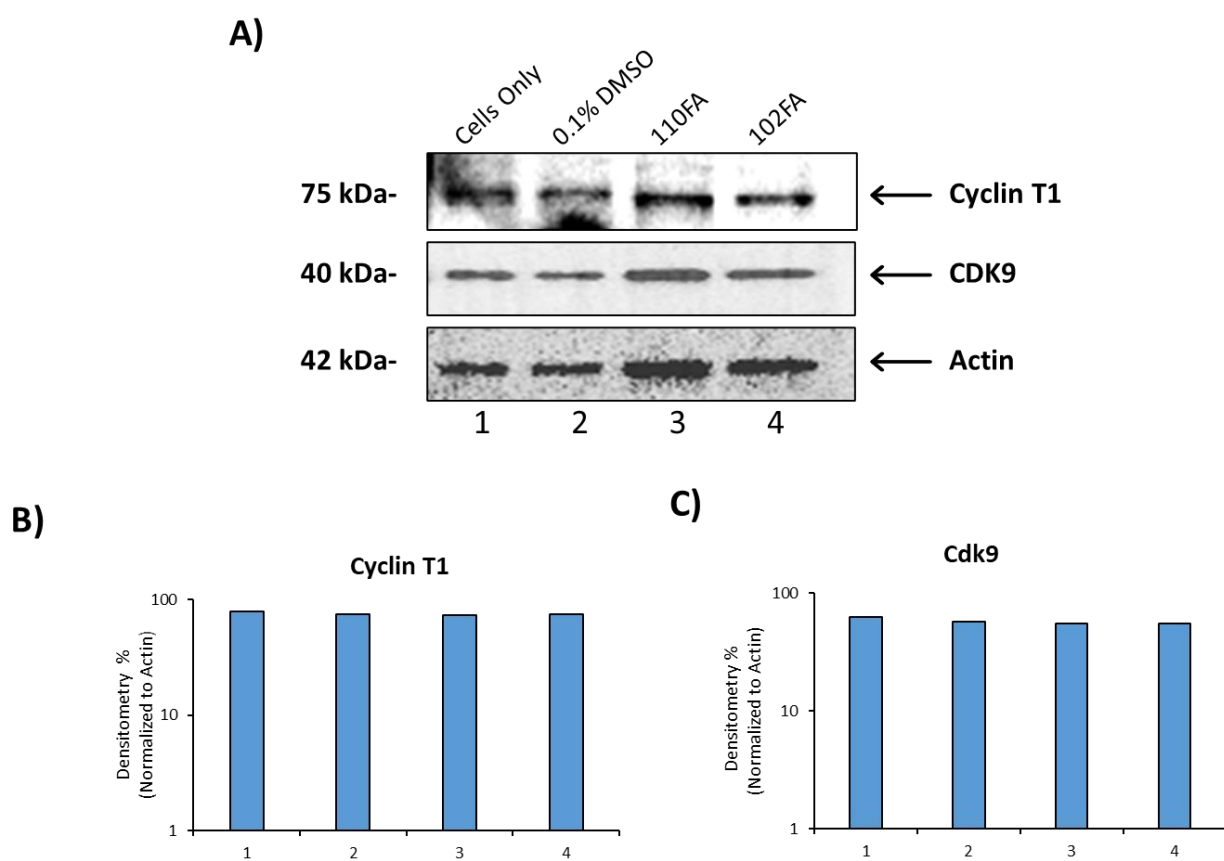

**Figure S6. Western blot analysis of the lead TAR-binding molecules effects on HEK293T cells.** A) The two lead TAR-binding molecules 110FA and 102FA were used to treat HEK293T cells at 1  $\mu$ M each at 0 hr and 48hrs timepoints. After 72 h of treatment,

## Supplementary Information

whole cell lysates were generated, run on Western blots, and probed with antibodies against HIV-1 viral proteins Cyclin T1 and Cdk9. Additionally,  $\beta$ -Actin was probed as a control. Densitometry counts were performed on the Western blot data for Cyclin T1 (**B**) and Cdk9 (**C**) all of which were normalized to Actin levels.

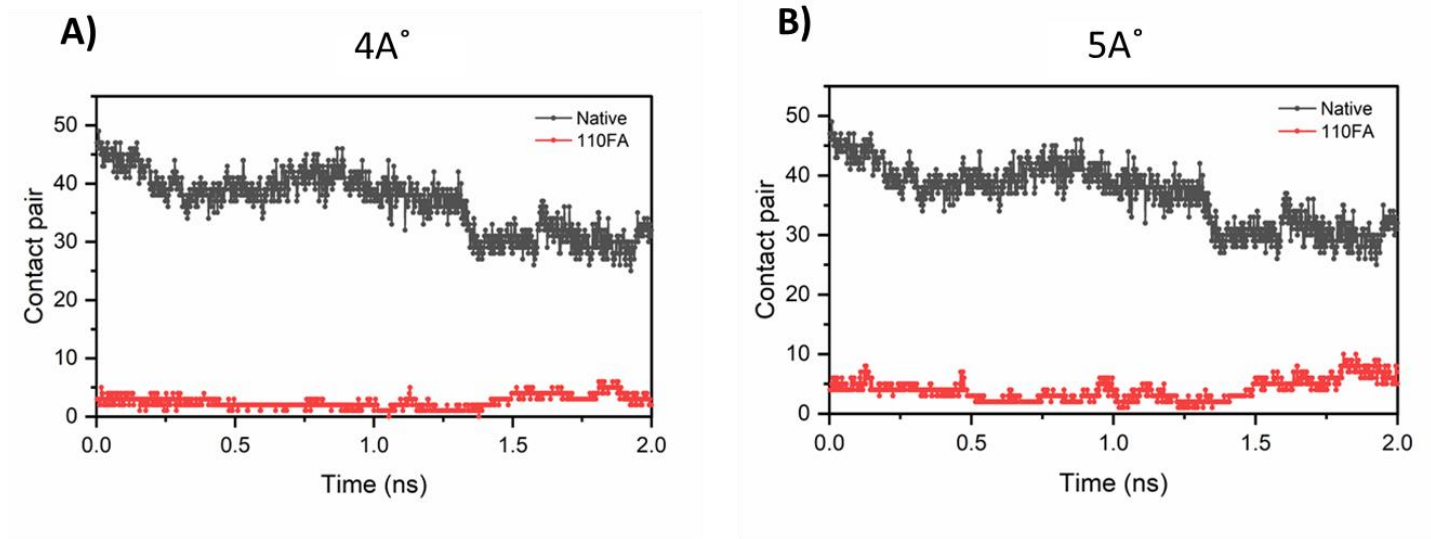

**Figure S7. Effect of different cut-off values on contact pair between TAR RNA and Tat in native and 110FA bound state.** Contact pair between TAR RNA and Tat protein was calculated in complex with and without 110FA at 4A° (**A**) and 5A° (**B**).



## Supplementary Information

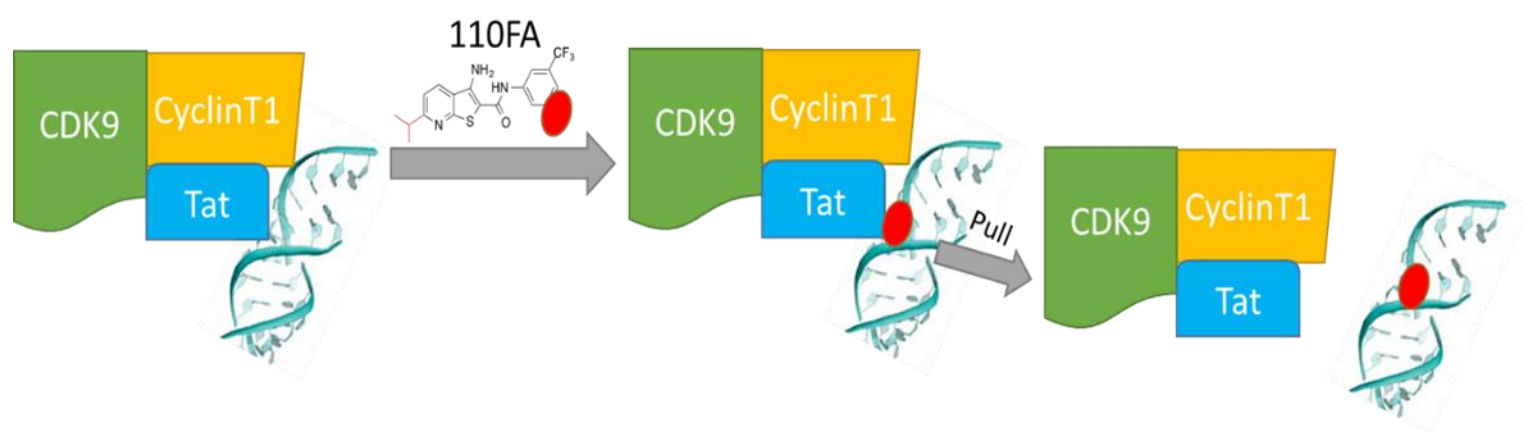

Figure S8. Molecular Dynamics (MD) Derived Model.

## Supplementary Information

**Supplementary Table S1** : Residue Contact pairs in native and 110FA bound state.

### 1. Native Contacts (Figure 9A)

|                                     |
|-------------------------------------|
| <b>Cdk9-Tat (PDB ID: 6CYT):</b>     |
| S175-K9                             |
| R172, A173, F174-W11                |
| S175, A177, N183-K12                |
| <b>CyclinT1-TAR (PDB ID: 6CYT):</b> |
| R251-U31                            |
| W258-G32                            |
| R259-U31, G32                       |

### 2. List of “decreased” contacts with 110FA (Figure 9B) are:

|                        |
|------------------------|
| <b>Tat-TAR RNA:</b>    |
| G19-K50, K51, R52      |
| A20-K50, R56           |
| G21-K50, R56           |
| C22-R52, R53, R56, R57 |
| U23-R52, R53, Q54      |
| C24-R54                |
| C26, U27- R54          |

## Supplementary Information

Supplementary Table S2. Binding Energy output by HDOCK.

| <u>Without Complex</u> |        | <u>With Complex</u> |         | Binding energy (Kcal/mol) |
|------------------------|--------|---------------------|---------|---------------------------|
| Molecules              | 102FA  | 110FA               | 102FA   | 110FA                     |
| 1                      | -99.51 | -104.14             | -153.32 | -146.06                   |
| 2                      | -95.34 | -103.18             | -149.37 | -138.46                   |
| 3                      | -89.81 | -101.12             | -140.73 | -133.16                   |
| 4                      | -86.6  | -99.38              | -137.75 | -129.97                   |
| 5                      | -85.95 | -96.73              | -137.46 | -128.87                   |
| 6                      | -82.85 | -89.56              | -134.96 | -128.13                   |
| 7                      | -70.39 | -85.04              | -131.61 | -126.76                   |
| 8                      | -69.92 | -84.91              | -128    | -125.48                   |
| 9                      | -68.86 | -83.43              | -122.07 | -124.32                   |
| 10                     | -68.13 | -80.33              | -120.02 | -123.55                   |
